# Supplementary material for: Selected Physiological Effects of a Garcinia Gummi-Gutta Extract in Rats Fed with Different Hypercaloric Diets
Source: MDPI journal article supplement (doi:10.3390/nu10050565), 2018-05-04
Supplement: s1 [file s1]

# Selected Physiological Effects of a *Garcinia gummi-gutta* Extract in Rats Fed with Different Hypercaloric Diets

Supplementary Material:

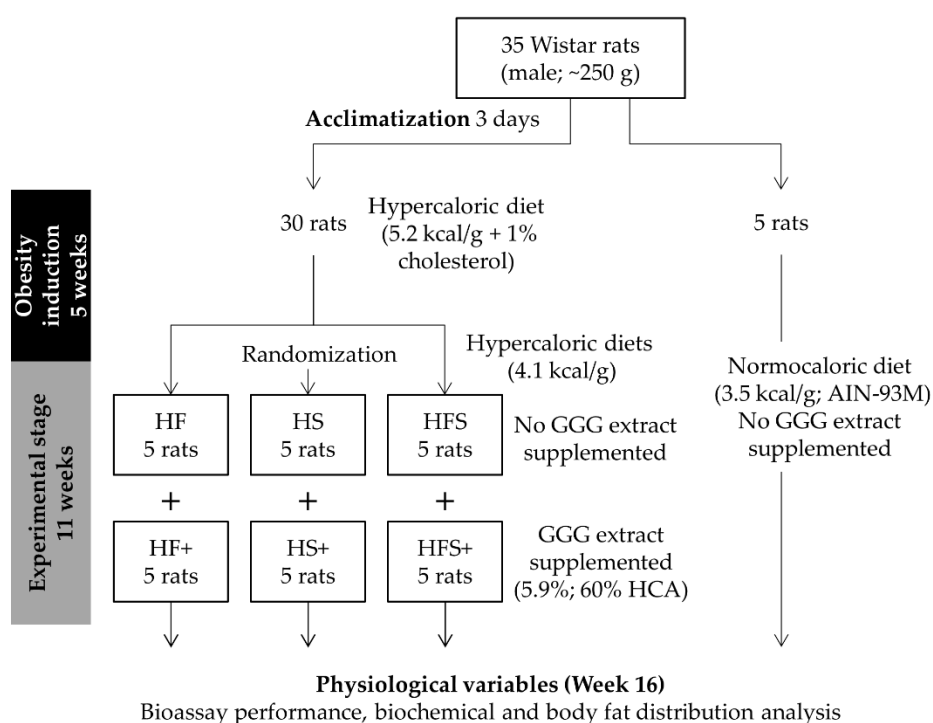

**Figure S1.** Experimental design (flowchart). *Garcinnia gummi-gutta* rind extract (GGG). Diet nomenclature is described within the text.

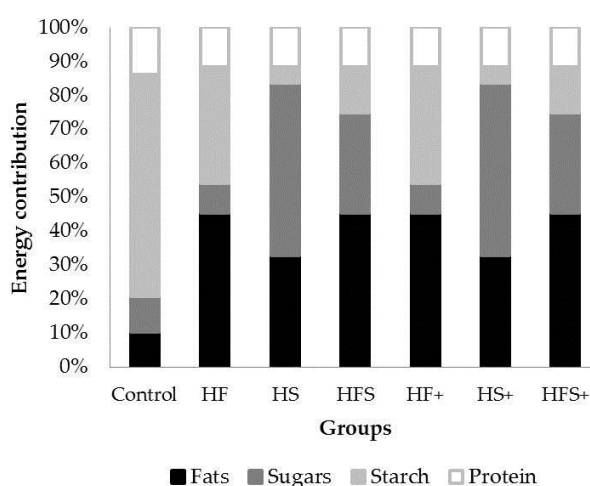

**Figure S2.** Caloric contribution of macronutrients in experimental diets. High fat (HF), high sugar (HS), western (high fat/sugar; HFS) alone or supplemented with GGG rind extract (HF+, HS+, HFS+).
